# Supplementary material for: Analysis of the Impact of the Presence of Phylum Cyanobacteria in the Microbiome of Patients with Breast Cancer on Their Prognosis
Source: MDPI journal article supplement (doi:10.3390/jcm11247272), 2022-12-07
Supplement: s1 [file s1]

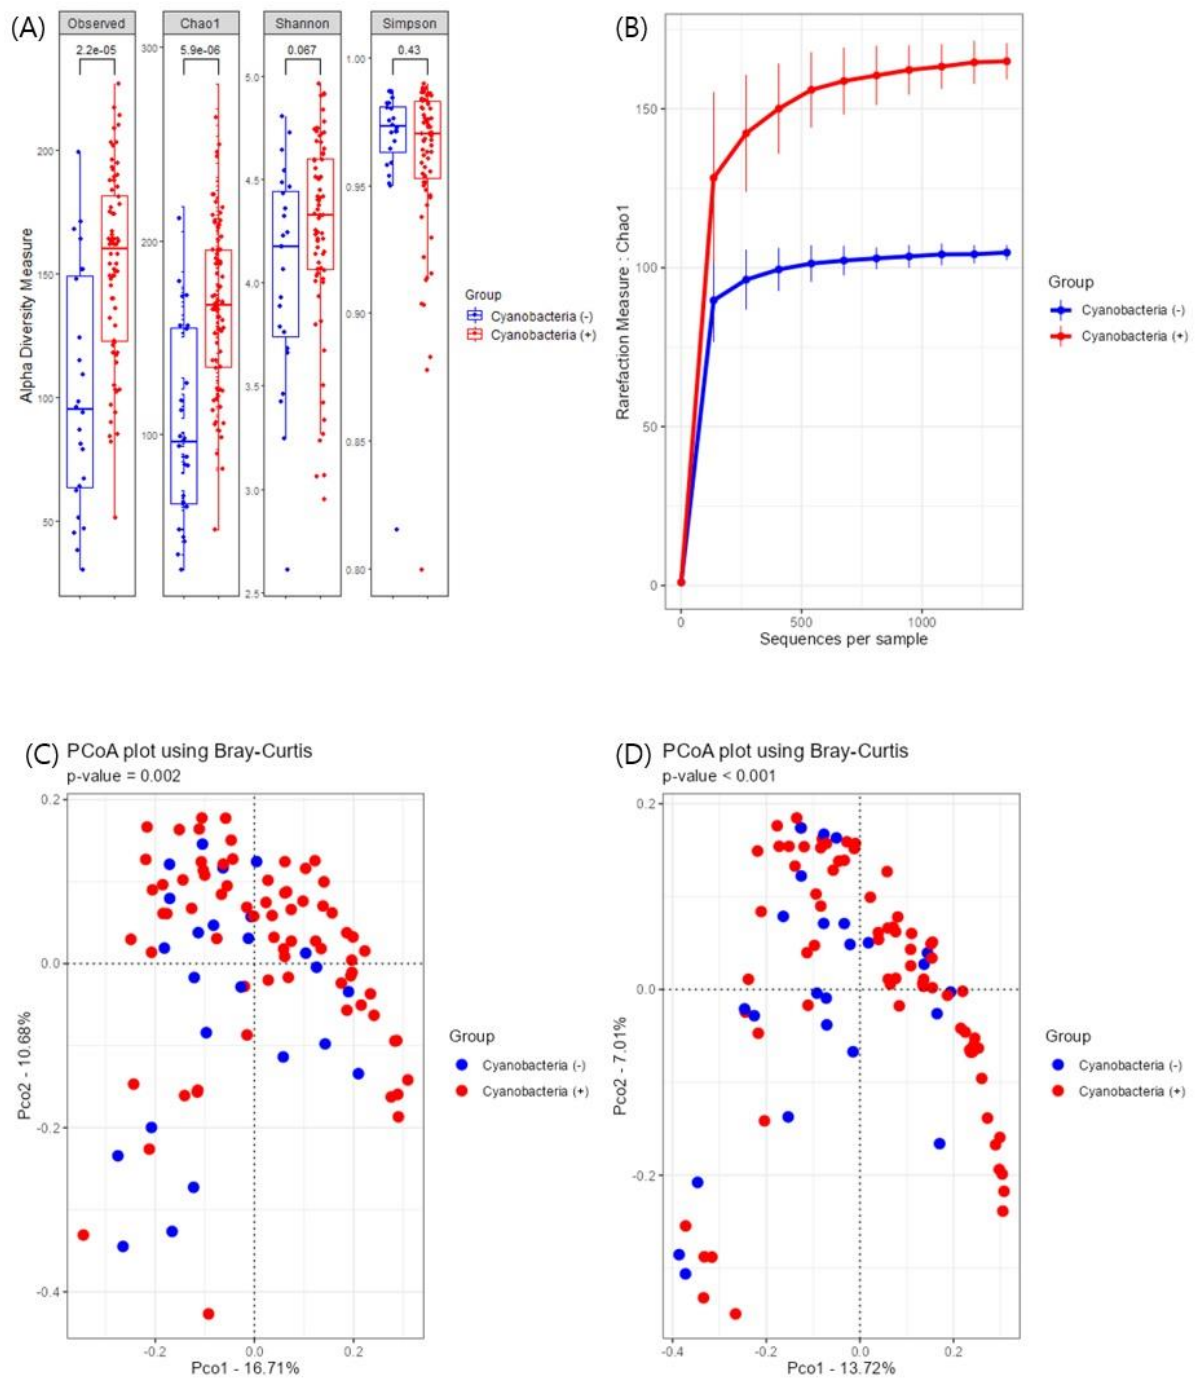

**Figure S1.** Analysis of Alpha diversity or beta-diversity by dividing the group without phylum Cyanobacteria (Cyanobacteria(-)) and with phylum Cyanobacteria (Cyanobacteria(+)). (A) Comparison of alpha-diversity of the two groups via the observed, Chao1, Shannon, and Simpson methods; (B) Comparison of the Chao1 index of the two groups through box plot; (C) Comparison of beta-diversity of the two groups at the genus level through PCoA. (D) Comparison of beta-diversity of the two groups at the species level through principal coordinates analysis (PCoA).

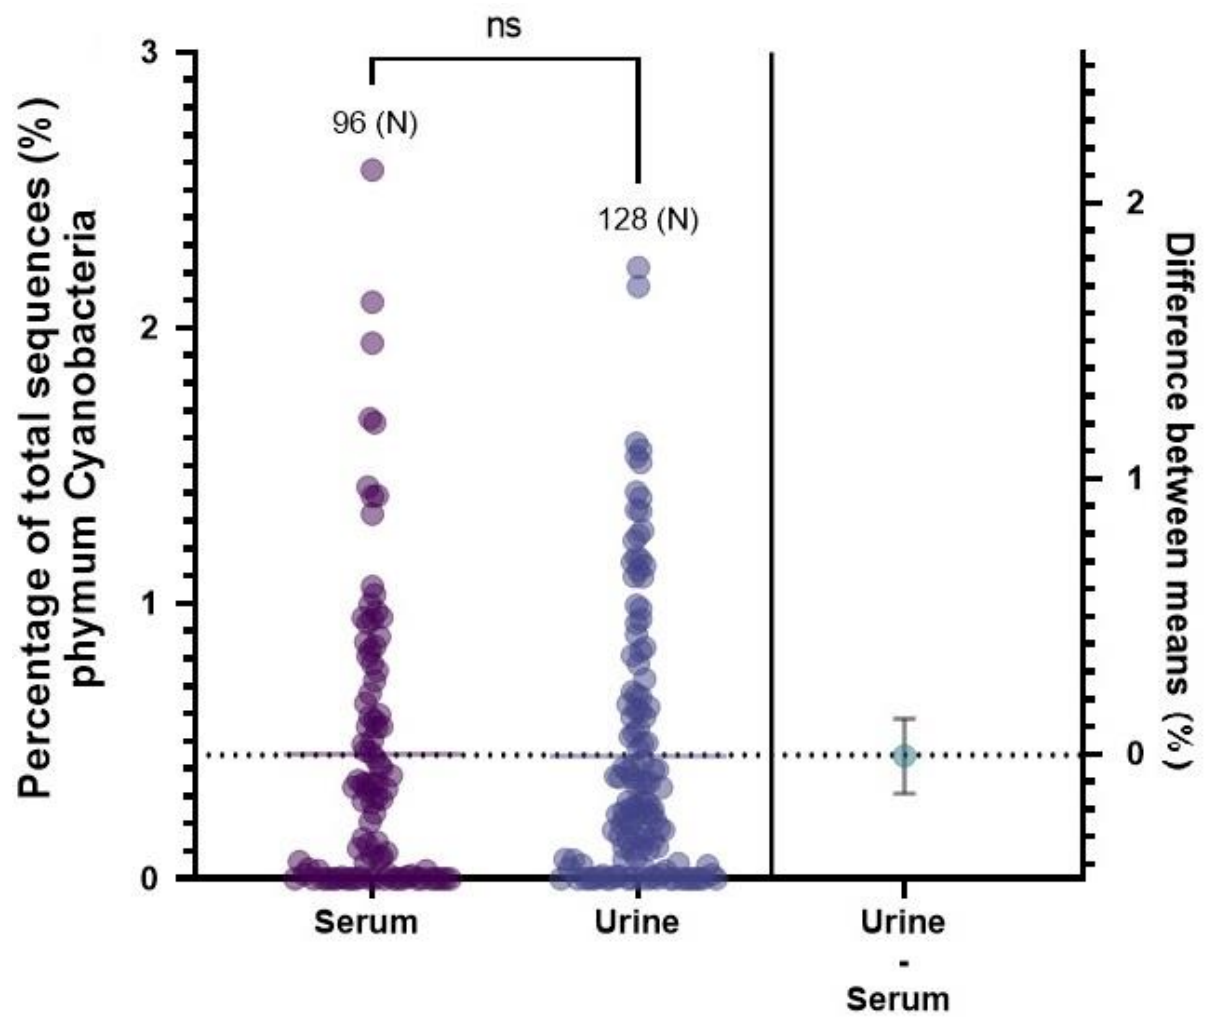

**Figure S2.** The level of the phylum Cyanobacteria in patients with breast cancer via serum and urine samples. The relative proportion of phylum Cyanobacteria in serum or urine was compared; Urine-Serum: Mean difference in phylum Cyanobacteria between the two sample groups.

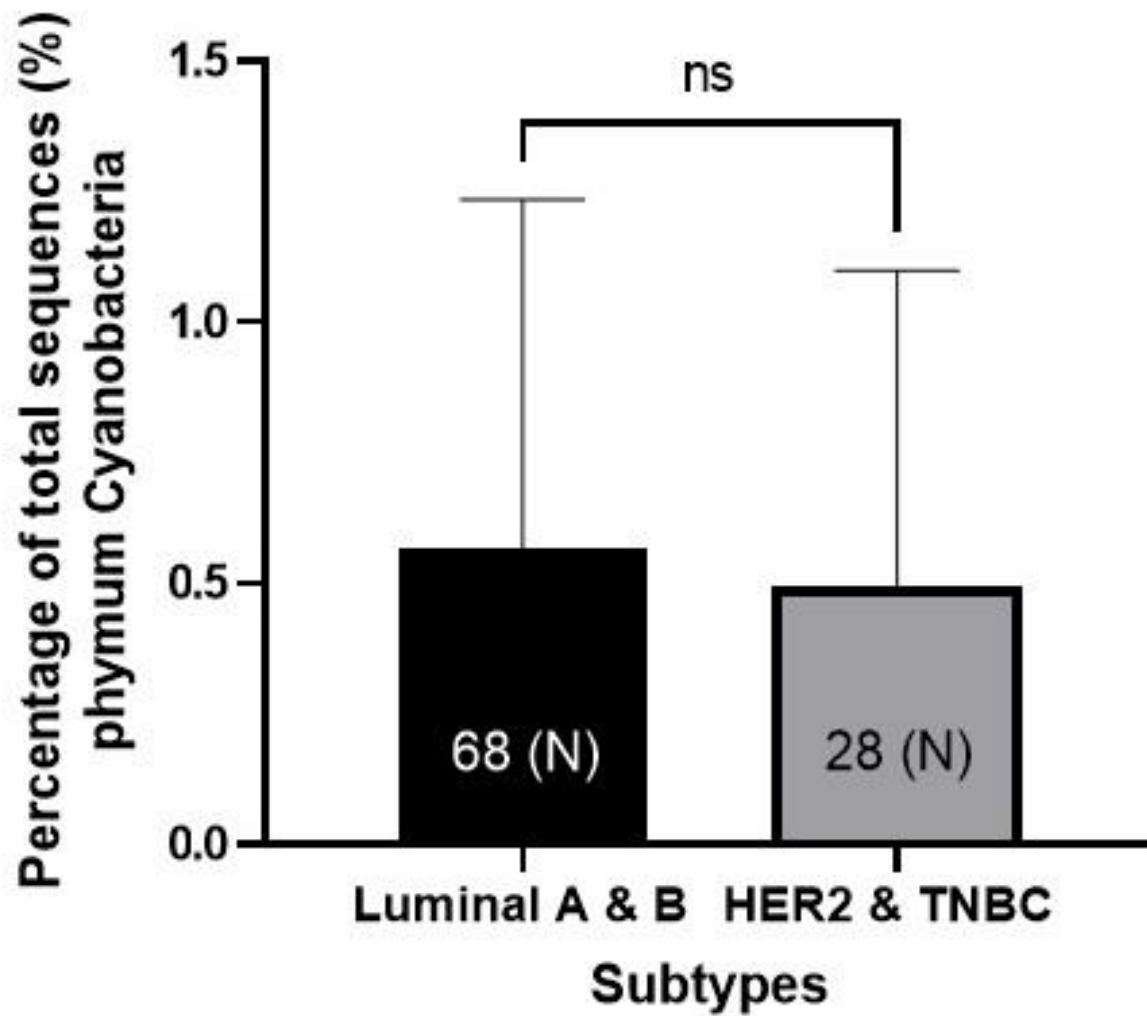

**Figure S3.** The percentage of phylum Cyanobacteria according to breast cancer with hormone-positive (luminal A and B) or hormone-negative (HER2 and TNBC); HER2: human epidermal growth factor receptor 2; TNBC: triple-negative breast cancer; (N): numbers of patients; ns: no significance.
